# Supplementary material for: Orientation-Mediated Luminescence Enhancement and Spin-Orbit Coupling in ZnO Single Crystals
Source: MDPI journal article supplement (doi:10.3390/nano12132192), 2022-06-26
Supplement: s1 [file s1]

# Orientation-Mediated Luminescence Enhancement and Spin-Orbit Coupling in ZnO Single Crystals

Ali Hassan <sup>1,2,\*</sup>, Abbas Ahmad Khan <sup>3,\*</sup>, Yeong Hwan Ahn <sup>3</sup>, Muhammad Azam <sup>4</sup>, Muhammad Zubair <sup>5</sup>, Wei Xue <sup>1,6</sup> and Yu Cao <sup>1,6,\*</sup>

<sup>1</sup> China International Science & Technology Cooperation Base for Laser Processing Robotics, Wenzhou University, Wenzhou 325035, China; xm@wzu.edu.cn

<sup>2</sup> Zhejiang Provincial Key Laboratory of Laser Processing Robotics, College of Mechanical and Electrical Engineering, Wenzhou University, Wenzhou 325035, China

<sup>3</sup> Department of Physics and Department of Energy Systems Research, Ajou University, Suwon 16499, Korea; ahny@ajou.ac.kr

<sup>4</sup> Department of Physics, Faculty of Sciences, University of Central Punjab, Lahore 54000, Pakistan; muhammad.azam01@ucp.edu.pk

<sup>5</sup> Centre for Advanced Materials Application CEMEA, Slovak Academy of Sciences, Dubravská Cesta 9, 845 11 Bratislava, Slovak Republic; muhammad.zubair@savba.sk

<sup>6</sup> Oujiang Laboratory (Zhejiang Lab for Regenerative Medicine, Vision and Brain Health), Wenzhou University, Wenzhou 325000, China

\* Correspondence: alirao@wzu.edu.cn (A.H.); abbaskhan@ajou.ac.kr (A.A.K.); yuca@wzu.edu.cn (Y.C.)

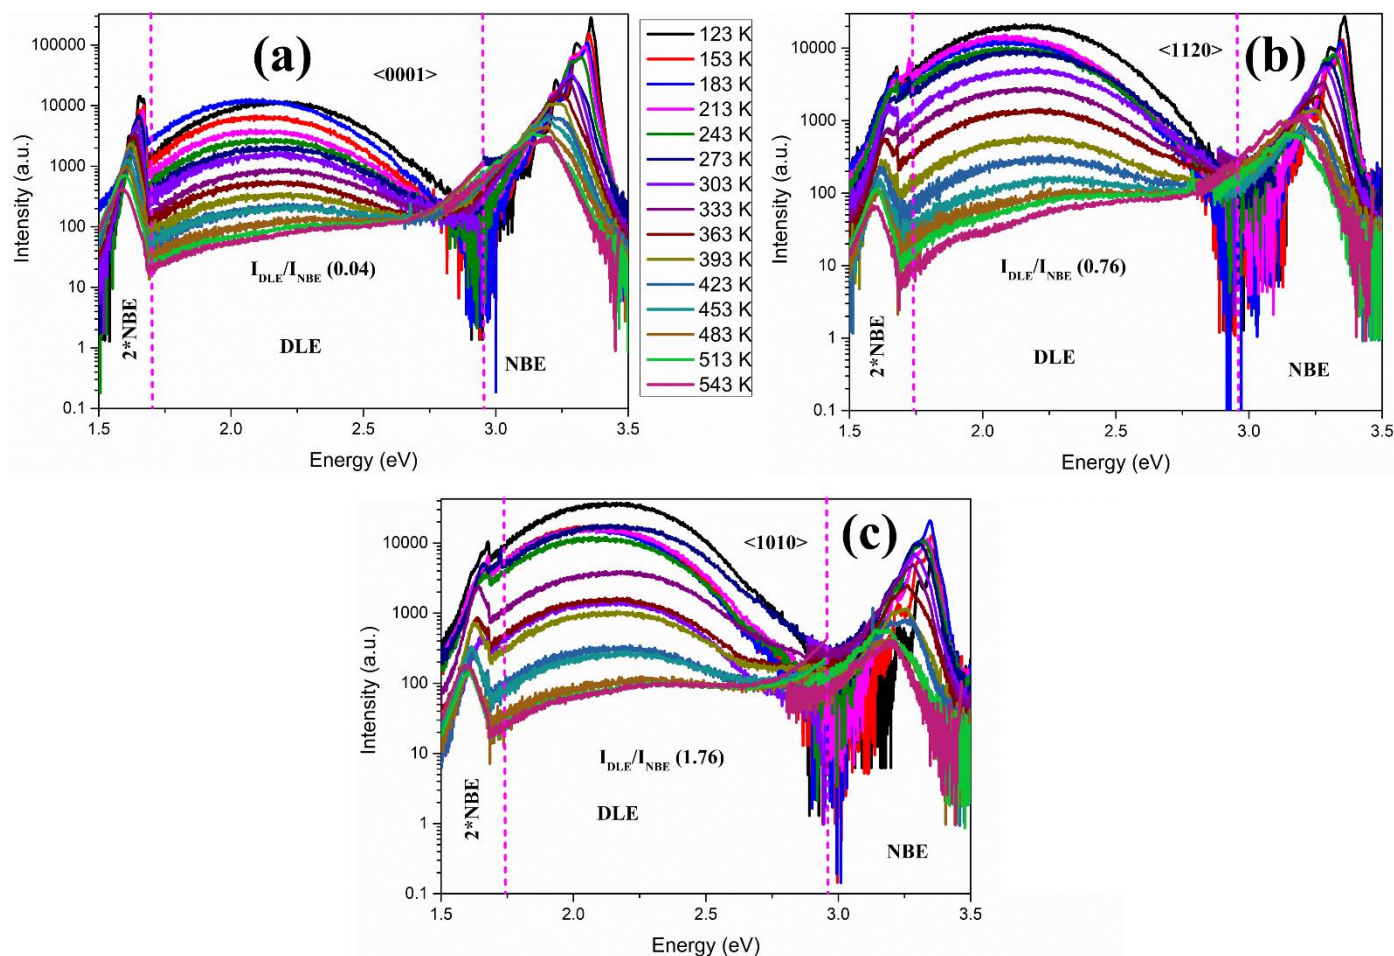

**Figure S1:** Complete scan of temperature-dependent photoluminescence spectra of (a) <0001> (b) <1120> (c) <1010> orientation of ZnO single crystals measured with 320 nm excitation wavelength over the temperature range of 123-543 K. Here NBE and DLE represents the near-band-edge and deep level emission, respectively.  $I_{NBE}$  and  $I_{DLE}$  denotes the intensity of NBE and DLE.

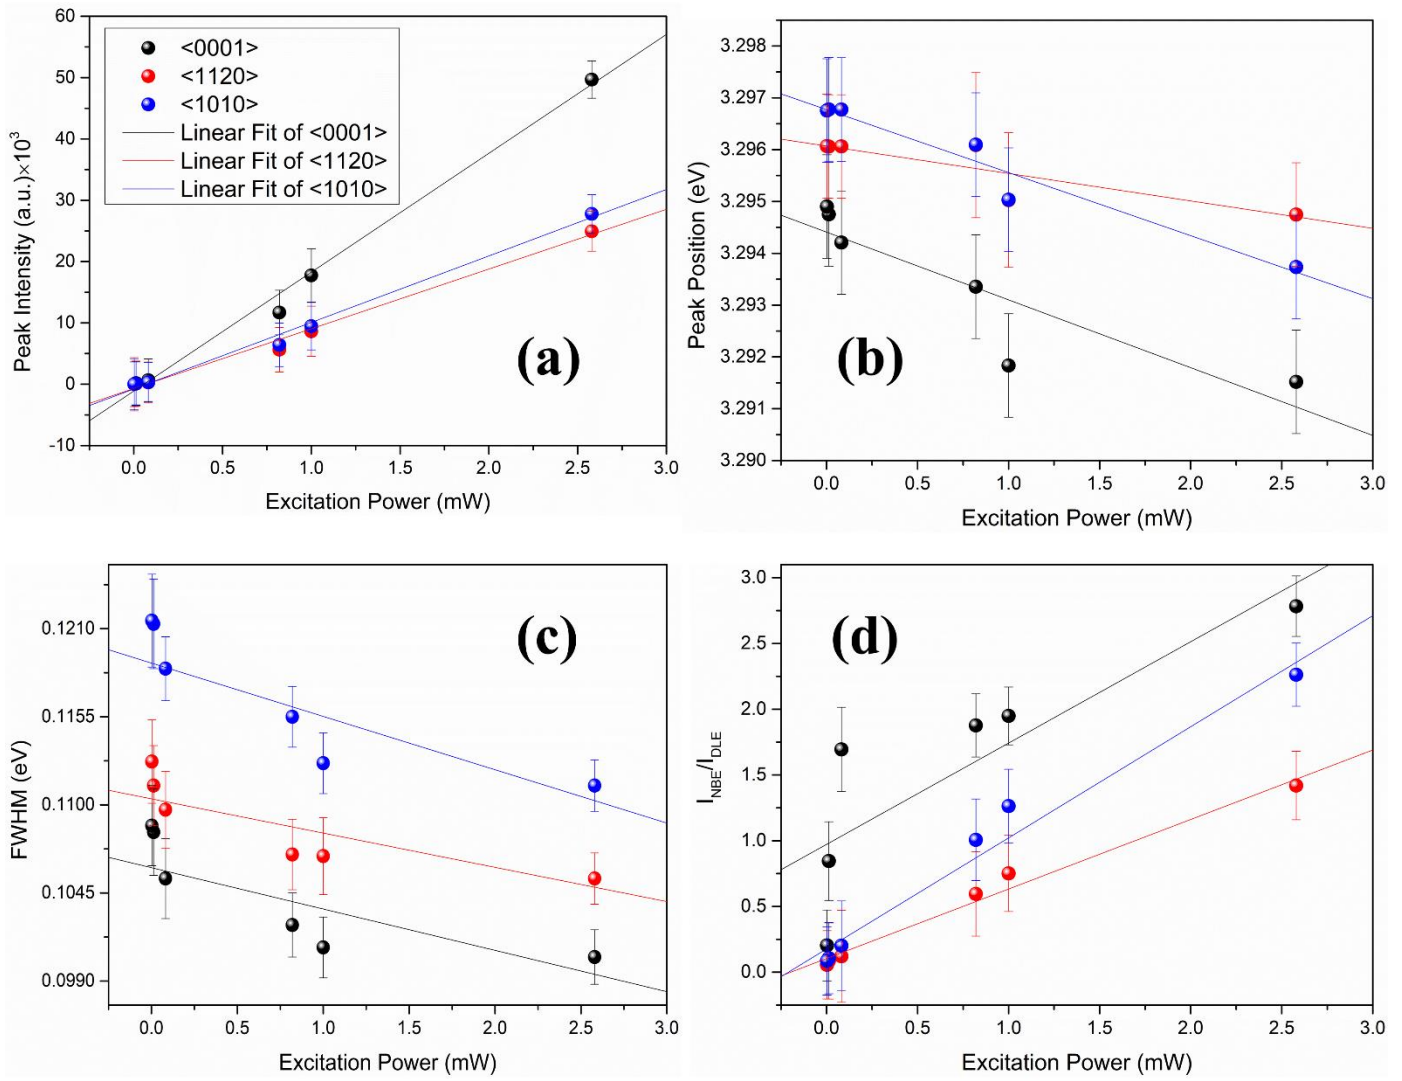

**Figure S2:**The relationship between (a) peak intensity (b) peak position (c) FWHM (d) ratio of NBE/DLE intensity as a function of excitation power for ZnO single crystals with three distinct orientations . The solid lines represent a linear fit of the experimentally observed data points, while the black, red, and blue solid spheres represent experimentally observed data of  $\langle 0001 \rangle$ ,  $\langle 1120 \rangle$ , and  $\langle 1010 \rangle$  ZnO single crystals.

**Table S1:** Room-temperature PL peak position, intensity ratio and the Varshni's fit parameters for ZnO single crystals with different orientations.

| Orientation Type       | NBE Peak Position (eV) | DLE Peak Position (eV) | $I_{\text{DLE}}/I_{\text{NBE}}$ | $\alpha$ (eV/K) | $\beta$ (K) |
|------------------------|------------------------|------------------------|---------------------------------|-----------------|-------------|
| $\langle 0001 \rangle$ | 3.28                   | 2.17                   | 0.074                           | 0.00104         | 897         |
| $\langle 1120 \rangle$ | 3.29                   | 2.15                   | 1.434                           | 0.00102         | 928         |
| $\langle 1010 \rangle$ | 3.29                   | 2.15                   | 1.705                           | 0.00109         | 1016        |
